# Supplementary material for: Nanoclay stabilized Pickering miniemulsion of fluorinated copolymer with improved hydrophobicity via RAFT polymerization
Source: Royal Society of Chemistry journal article supplement (doi:10.1039/c5ra25808a), 2016-01-01
Supplement: c5ra25808a1.pdf [file c5ra25808a1.pdf]

## Nanoclay Stabilized Pickering Miniemulsion of Fluorinated Copolymer with Improved Hydrophobicity via RAFT Polymerization

Arindam Chakrabarty, Siva Ponnupandian, Kinsuk Naskar, Nikhil K Singha\*

*Rubber Technology Centre, Indian Institute of Technology Kharagpur*

*Kharagpur-721302, India*

### Supporting Information

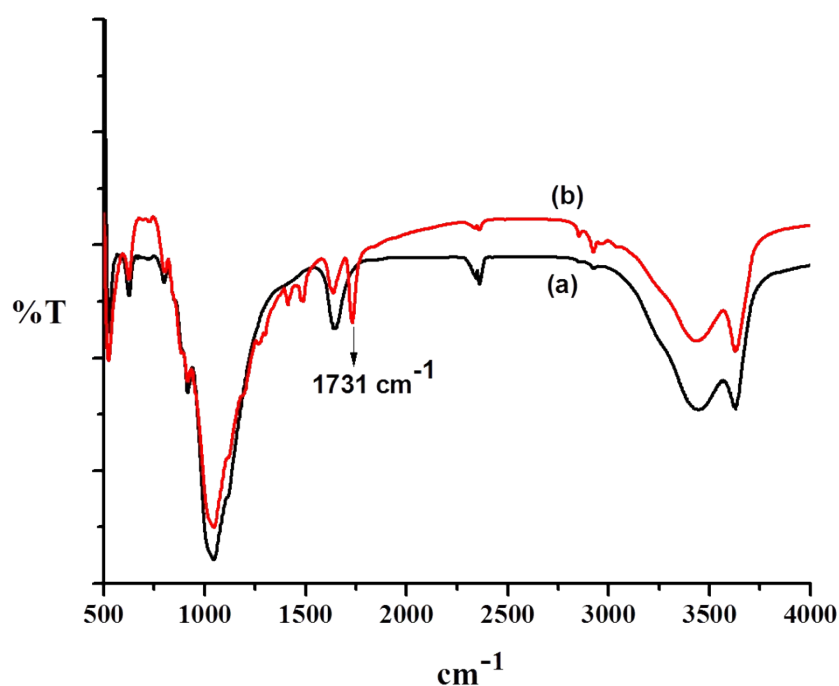

**Figure S1:** FTIR spectra of a) neat NaMMT and b) NaMMT modified with AETAC.

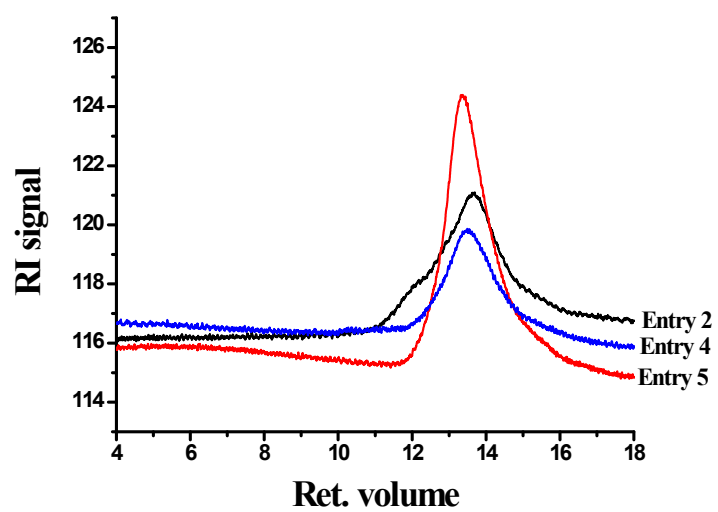

**Figure S2:** GPC profiles of the fluorinated copolymers prepared via RAFT Pickering miniemulsion polymerization.
